# Supplementary material for: The interaction of affix size, type and shape: a cross-linguistic study
Source: publisher site journal article supplement (doi:10.1515/lingty-2024-0004), 2024-11-04
Supplement: Supplementary file 1 [file j_lingty-2024-0004_suppl_001.docx]

##### Code for paper on Affix Phonology (Zingler & Rogers)
##### Written by Phillip G. Rogers


# Packages
library(tidyverse)
library(lme4)
library(lmerTest)
library(DescTools)
library(effects)
library(sjPlot)
library(ggeffects)
library(car)
library(data.table)
library(performance)
library(patchwork)


# Read in the data
data <- read.csv(file.choose(), header=TRUE)

# Fill in language names
data$Language[data$Language == ""] <- NA
data <- data %>% fill(Language)

# Limit to just prefixes and suffixes
data <- data[data$Type == "P" | data$Type == "S",]

# Set data types
data$Language <- as.factor(data$Language)
data$Type <- as.factor(data$Type)
data$Syllables <- as.numeric(data$Syllables)
data$Segments <- as.numeric(data$Segments)
data$Allomorphs <- as.numeric(data$Allomorphs)

# Create binary Allomorphy variable
data$Allomorphy <- as.numeric(data$Allomorphs >= 2)


## Exploration of the data in tables and plots

# Number of affixes more than two syllables and more than two segments
nrow(data[data$Segments > 2,])
nrow(data[data$Syllables > 2,])

# Number of affixes with allomorphy
nrow(data[data$Allomorphs > 1,])

# Segment lengths
ggplot(data, aes(x = Segments)) +
  geom_histogram()

# Syllables
ggplot(data, aes(x = Syllables)) +
  geom_histogram()

# Allomorphs
ggplot(data, aes(x = Allomorphs)) +
  geom_histogram()

# Number of prefixes and suffixes for each language
rename(count(data, Language, Type), Freq = n)

# Affix lengths by type and language (using averages and standard deviations)
segment_table <- data %>% group_by(Language, Type) %>% 
  summarise(mean_segments = mean(Segments), sd_segments = sd(Segments), .groups = 'drop') %>%
  as.data.frame()
segment_table$sd_max = segment_table$mean_segments + segment_table$sd_segments
segment_table$sd_min = segment_table$mean_segments - segment_table$sd_segments

ggplot(segment_table, aes(x = Language)) +
  geom_pointrange(aes(y = mean_segments, ymin = sd_min, ymax = sd_max, color = Type), position = position_dodge(.5)) +
  labs(y = "Segments (means and standard deviations)") +
  theme(axis.text.x = element_text(angle = 45, vjust = 0.5))


## Plot histograms of segments and syllables by affix type

# Lengths of prefixes vs. suffixes (segments)
p1 <- ggplot(data, aes(x = Segments, group = Type, color = Type)) +
  geom_histogram(aes(y = after_stat(count / sum(count))), fill = "grey30", bins = 15,
                 data = ~ subset(., Type %in% c("P"))) +
  geom_histogram(aes(y = -after_stat(count / sum(count))), fill = "grey30", bins = 15,
                 data = ~ subset(., Type %in% c("S"))) +
  scale_color_manual(values = c("P" = "cyan2", "S" = "deeppink1"), labels=c('Prefixes', 'Suffixes')) +
  geom_hline(yintercept = 0, color = "grey30") +
  scale_y_continuous(limits = c(-.38, .38), breaks = c(-0.2, 0, 0.2), 
                     labels = c("0.2", "0", "0.2")) +
  theme(legend.title=element_blank(), axis.title.y=element_blank()) +
  scale_x_continuous(breaks = c(1:8)) +
  labs(x = "Number of segments")

# Lengths of prefixes vs. suffixes (syllables)
p2 <- ggplot(data, aes(x = Syllables, group = Type, color = Type)) +
  geom_histogram(aes(y = after_stat(count / sum(count))), fill = "grey30", bins = 17,
                 data = ~ subset(., Type %in% c("P"))) +
  geom_histogram(aes(y = -after_stat(count / sum(count))), fill = "grey30", bins = 17,
                 data = ~ subset(., Type %in% c("S"))) +
  scale_color_manual(values = c("P" = "cyan2", "S" = "deeppink1"), labels=c('Prefixes', 'Suffixes')) +
  geom_hline(yintercept = 0, color = "grey30") +
  scale_y_continuous(limits = c(-.63, .63), breaks = c(-0.4, 0, 0.4), labels = c("0.4", "0", "0.4")) +
  theme(legend.position="none") +
  labs(y = "Proportion (within each affix type)", x = "Number of syllables")

tiff("/Users/pgr/Documents/Projects/Affix_phonology/affix_phonology/Images/histograms_by_type.tiff", units="in", width=6, height=3, res=300)
p2 + p1
dev.off()


# Relationship of allomorphy to affix type
table(data$Type, data$Allomorphy)
chisq.test(data$Type, data$Allomorphy, correct = FALSE)

ggplot(data, aes(x = Allomorphs, group = Type, color = Type)) +
  geom_histogram(aes(y = ..count..), fill = "darkgrey", bins = 33,
                 data = ~ subset(., Type %in% c("P"))) +
  geom_histogram(aes(y = -..count..), fill = "darkgrey", bins = 33,
                 data = ~ subset(., Type %in% c("S"))) +
  labs(y = "Count", x = "Number of allomorphs")

# Plotting segment length as a function of the presence of allomorphy
ggplot(data, aes(y = Allomorphs, x = Segments)) +
  geom_jitter() +
  geom_smooth(method = lm)

ggplot(data, aes(group = Allomorphs, y = Segments)) +
  geom_boxplot()

## Hypothesis 1

# Independent variables: Monosyllabicity (monosyllabic vs. non-monosyllabic)
# Dependent variables: Count
# Random effects: Languages

# Create binary variable for monosyllabicity
data$Syllabicity <- ifelse(data$Syllables == 1, "Monosyllabic", "Non-monosyllabic")

# Quick test to see if monosyllabicity varies based on affix type
chisq.test(table(data$Syllabicity, data$Type), simulate.p.value = TRUE)

# Create new dataframe with count data
count_data <- reshape2::melt(table(data$Syllabicity, data$Language), value.name = "Count")
colnames(count_data)[1] <- "Syllabicity"
colnames(count_data)[2] <- "Language"
count_data$Syllabicity <- relevel(count_data$Syllabicity, "Non-monosyllabic")

summary(data$Language)


# Regression model

# Initial model
m100 <- glmer(Count ~ Syllabicity + (1|Language), count_data, family = poisson())
m100

# Fixed Effects:
#   (Intercept)  SyllabicityMonosyllabic  
# 2.9569                   0.4187

# Random effects:
#  Groups   Name        Std.Dev.
# Language (Intercept) 0.6847

# Alternative model and comparison
m101 <- glmer(Count ~ 1 + (1|Language), count_data, family = poisson())
anova(m100, m101)
# npar    AIC    BIC  logLik deviance  Chisq Df Pr(>Chisq)    
# m101    2 541.01 544.83 -268.50   537.01                         
# m100    3 480.66 486.40 -237.33   474.66 62.345  1  2.883e-15 ***

#χ2(1) = 62.35, p < 0.001 ***

# Get confidence intervals for the model
ci <- confint(m100)
ci
#                         2.5 %     97.5 %
#  .sig01                 0.5028107 0.9725700
#(Intercept)              2.6541230 3.2470634
#SyllabicityMonosyllabic  0.3139582 0.5241309

pp <- profile(m100)
ggplot(as.data.frame(pp),aes(.focal,.zeta))+
  geom_point()+geom_line()+
  facet_wrap(~.par,scale="free_x")+
  geom_hline(yintercept=0,colour="gray")+
  geom_hline(yintercept=c(-1.96,1.96),linetype=2,
             colour="gray")

# Quick look
plot(allEffects(m100))

# Check residuals
plot(m100)
rs <- DHARMa::simulateResiduals(m100)
plot(rs)

# Plot random effects
plot_model(m100, ,type="pred", terms=c("Syllabicity", "Language"), pred.type="re", ci.lvl = NA)

# Generate predictions for plotting
preds <- as.data.frame(predictorEffect("Syllabicity", m100))

# Plot predictions of model
tiff("/Users/pgr/Documents/Projects/Affix_phonology/affix_phonology/Images/count_by_monosyllabicity.tiff", units="in", width=3, height=5, res=300)
ggplot() +
  geom_pointrange(data = preds, aes(x = Syllabicity, y = fit, ymin = lower, ymax = upper)) +
  geom_errorbar(data = preds, aes(x = Syllabicity, y = fit, ymin = lower, ymax = upper), width = .05) +
  scale_y_continuous(limits = c(0, 50)) +
  labs(y = "Number of affixes") +
  scale_x_discrete(labels=c("0" = "Non-monosyllabic", "1" = "Monosyllabic")) +
  theme(axis.title.x=element_blank()) +
  geom_line(data = preds, aes(x = Syllabicity, y = fit, group = 1), linetype = 3)
dev.off()

# Histogram of syllable lengths per language
tiff("/Users/pgr/Documents/Projects/Affix_phonology/affix_phonology/Images/syllable_lengths_by_language.tiff", units="in", width=8, height=8, res=300)
ggplot(data, aes(x = Syllables)) +
  geom_histogram(aes(fill = Syllabicity), bins = 9) +
  facet_wrap(vars(Language), ncol = 5) +
  labs(y = "Number of Affixes") +
  scale_fill_manual(values = c("blue", "grey30")) +
  theme(legend.position = "none")
dev.off()


## Hypothesis 2 - Segments

# Independent variables: Type (binary)
# Dependent variables: Segment length (numeric)
# Random effects: Languages

# Normalize dependent variable
data$Segments_bc <- BoxCox(data$Segments, lambda = BoxCoxLambda(data$Segments))
hist(data$Segments_bc)

# Exploring correlation between intercepts and slopes
ggplot(data, aes(x = Type, y = Segments)) +
  geom_smooth(aes(group = Language), method = "lm", se = FALSE)
# Looks like uncorrelated intercepts and slopes

# Regression model

# REML = FALSE models for model selection
m01_ <- lmer(Segments_bc ~ Type + (1 + Type|Language), data, REML = FALSE)

# Alternative model and comparison
m02_ <- lmer(Segments_bc ~ 1 + (1 + Type|Language), data, REML = FALSE)
anova(m01_, m02_)
# npar    AIC    BIC  logLik deviance  Chisq Df Pr(>Chisq)   
# m02_    5 1928.9 1955.3 -959.45   1918.9                        
# m01_    6 1921.0 1952.7 -954.51   1909.0 9.8885  1   0.001663 **

# REML = TRUE model for reporting
m01 <- lmer(Segments_bc ~ Type + (1 + Type|Language), data)
m01

# Fixed Effects:
#   (Intercept)        TypeS  
# 0.6365       0.2308

# Random effects:
#   Groups   Name        Std.Dev. Corr 
# Language (Intercept) 0.3173        
# TypeS       0.2552   -0.79
# Residual             0.4534

# Get confidence intervals for the model
ci <- confint(m01)
ci

# 2.5 %     97.5 %
#   .sig01       0.21969598  0.4507453
# .sig02      -0.92636898 -0.4788438
# .sig03       0.15335713  0.3841382
# .sigma       0.43722236  0.4707338
# (Intercept)  0.48441988  0.7915335
# TypeS        0.09577835  0.3745494

pp <- profile(m01)
ggplot(as.data.frame(pp),aes(.focal,.zeta))+
  geom_point()+geom_line()+
  facet_wrap(~.par,scale="free_x")+
  geom_hline(yintercept=0,colour="gray")+
  geom_hline(yintercept=c(-1.96,1.96),linetype=2,
             colour="gray")

# Check residuals
plot(m01)
rs <- DHARMa::simulateResiduals(m01)
plot(rs)

# Quick look
plot(allEffects(m01))

# QQplot
qqPlot(residuals(m01))

# Plot random effects
plot_model(m01, ,type="pred", terms=c("Type", "Language"), pred.type="re", ci.lvl = NA)

# Generate predictions for plotting
preds <- as.data.frame(predictorEffect("Type", m01))

# Generate predictions for random effect levels
rpreds <- as.data.frame(ggpredict(m01, c("Type", "Language"), type = "random"))
rpreds$predicted_nbc <- BoxCoxInv(rpreds$predicted, lambda = BoxCoxLambda(data$Segments))
table(rpreds$predicted_nbc, rpreds$group)
rpreds
as.data.frame(rpreds[order(rpreds$group),])

# Un-transform predictions back to segment units
preds$fit_nbc <- BoxCoxInv(preds$fit, lambda = BoxCoxLambda(data$Segments))
preds$lower_nbc <- BoxCoxInv(preds$lower, lambda = BoxCoxLambda(data$Segments))
preds$upper_nbc <- BoxCoxInv(preds$upper, lambda = BoxCoxLambda(data$Segments))

# Create separate dfs for prefixes and suffixes for plotting purposes
p <- data[data$Type == "P",]
s <- data[data$Type == "S",]

# Plot
tiff("/Users/pgr/Documents/Projects/Affix_phonology/affix_phonology/Images/affix_length_by_type.tiff", units="in", width=3, height=5, res=300)
ggplot() +
  geom_pointrange(data = preds, aes(x = Type, y = fit_nbc, ymin = lower_nbc, ymax = upper_nbc)) +
  geom_errorbar(data = preds, aes(x = Type, y = fit_nbc, ymin = lower_nbc, ymax = upper_nbc), width = .05) +
  geom_rug(data = p, sides = "l", position = position_jitter(height = 0.15),
           aes(x = Type, y = Segments), alpha = 1/20) +
  geom_rug(data = s, sides = "r", position = position_jitter(height = 0.15),
           aes(x = Type, y = Segments), alpha = 1/20) +
  scale_y_continuous(limits = c(0.75, 5.25)) +
  labs(y = "Number of segments") +
  scale_x_discrete(labels=c("P" = "Prefixes", "S" = "Suffixes")) +
  theme(axis.title.x=element_blank()) +
  geom_line(data = preds, aes(x = Type, y = fit_nbc, group = 1), linetype = 3)
dev.off()


## Hypothesis 2 - Syllables

# Independent variables: Type (binary)
# Dependent variables: Segment length (numeric)
# Random effects: Languages

# Normalize dependent variable
data$Syllables_bc <- BoxCox(data$Syllables, lambda = BoxCoxLambda(data$Syllables))
hist(data$Syllables_bc)

# Exploring correlation between intercepts and slopes
ggplot(data, aes(x = Type, y = Syllables)) +
  geom_smooth(aes(group = Language), method = "lm", se = FALSE)
# Looks like uncorrelated intercepts and slopes

# Regression model

# REML = FALSE models for model selection
m51_ <- lmer(Syllables_bc ~ Type + (1 + Type|Language), data, REML = FALSE)
m51_

# Alternative model and comparison
m52_ <- lmer(Syllables_bc ~ 1 + (1 + Type|Language), data, REML = FALSE)
anova(m51_, m52_)
#     npar    AIC    BIC  logLik deviance  Chisq Df Pr(>Chisq)   
# m52_    5 2569.3 2595.7 -1279.6   2559.3                        
# m51_    6 2562.0 2593.7 -1275.0   2550.0 9.3203  1   0.002266 **

# REML = TRUE model for reporting
m51 <- lmer(Syllables_bc ~ Type + (1 + Type|Language), data)
m51

# Fixed Effects:
# (Intercept)        TypeS  
# -0.1597       0.3379

# Random effects:
#   Groups   Name        Std.Dev. Corr 
# Language (Intercept) 0.4413        
# TypeS       0.4026   -0.80
# Residual             0.5631

# Get confidence intervals for the model
ci <- confint(m51)
ci

#                  2.5 %      97.5 %
# .sig01       0.3075871  0.62582556
# .sig02      -0.9207960 -0.51550815
# .sig03       0.2630144  0.58876230
# .sigma       0.5429430  0.58452772
# (Intercept) -0.3687001  0.05704907
# TypeS        0.1350062  0.54705419

pp <- profile(m51)
ggplot(as.data.frame(pp),aes(.focal,.zeta))+
  geom_point()+geom_line()+
  facet_wrap(~.par,scale="free_x")+
  geom_hline(yintercept=0,colour="gray")+
  geom_hline(yintercept=c(-1.96,1.96),linetype=2,
             colour="gray")

# Check residuals
plot(m51)
rs <- DHARMa::simulateResiduals(m51)
plot(rs)

# Quick look
plot(allEffects(m51))

# QQplot
qqPlot(residuals(m51))

# Plot random effects
plot_model(m51, ,type="pred", terms=c("Type", "Language"), pred.type="re", ci.lvl = NA)

# Generate predictions for plotting
preds <- as.data.frame(predictorEffect("Type", m51))

# Generate predictions for random effect levels
rpreds <- as.data.frame(ggpredict(m51, c("Type", "Language"), type = "random"))
table(rpreds$predicted_nbc, rpreds$group)
rpreds$predicted_nbc <- BoxCoxInv(rpreds$predicted, lambda = BoxCoxLambda(data$Syllables))

# Un-transform predictions back to segment units
preds$fit_nbc <- BoxCoxInv(preds$fit, lambda = BoxCoxLambda(data$Syllables))
preds$lower_nbc <- BoxCoxInv(preds$lower, lambda = BoxCoxLambda(data$Syllables))
preds$upper_nbc <- BoxCoxInv(preds$upper, lambda = BoxCoxLambda(data$Syllables))

# Plot
tiff("/Users/pgr/Documents/Projects/Affix_phonology/affix_phonology/Images/syllable_length_by_type.tiff", units="in", width=3, height=5, res=300)
ggplot() +
  geom_pointrange(data = preds, aes(x = Type, y = fit_nbc, ymin = lower_nbc, ymax = upper_nbc)) +
  geom_errorbar(data = preds, aes(x = Type, y = fit_nbc, ymin = lower_nbc, ymax = upper_nbc), width = .05) +
  geom_rug(data = p, sides = "l", position = position_jitter(height = 0.15),
           aes(x = Type, y = Syllables), alpha = 1/20) +
  geom_rug(data = s, sides = "r", position = position_jitter(height = 0.15),
           aes(x = Type, y = Syllables), alpha = 1/20) +
  scale_y_continuous(limits = c(-0.25, 3.25)) +
  labs(y = "Number of syllables") +
  scale_x_discrete(labels=c("P" = "Prefixes", "S" = "Suffixes")) +
  theme(axis.title.x=element_blank()) +
  geom_line(data = preds, aes(x = Type, y = fit_nbc, group = 1), linetype = 3)
dev.off()


## Hypothesis 3

# Independent variable: Type (prefix vs. suffix)
# Dependent variable: Allomorphy (yes or no)
# Random effect: Language

# Exploring correlation between intercepts and slopes
ggplot(data, aes(x = Type, y = Allomorphy)) +
  geom_smooth(aes(group = Language), method = "lm", se = FALSE)
# Looks like uncorrelated intercepts and slopes

# Regression model

# Initial model
m11 <- glmer(Allomorphy ~ Type + (1 + Type|Language), data, family = "binomial")
m11

# Fixed Effects:
#   (Intercept)        TypeS  
# -2.9254       0.5192 

# Random effects:
#   Groups   Name        Std.Dev. Corr 
# Language (Intercept) 2.211         
# TypeS       1.344    -0.76

# Alternative model and comparison
m12 <- glmer(Allomorphy ~ 1 + (1 + Type|Language), data, family = "binomial")
anova(m11, m12)
# npar    AIC    BIC  logLik deviance Chisq Df Pr(>Chisq)
# m12    4 1025.2 1046.4 -508.62   1017.2                    
# m11    5 1026.4 1052.8 -508.20   1016.4  0.84  1     0.3594

# Get confidence intervals for the model
ci <- confint(m11, method="Wald")
ci

# 2.5 %    97.5 %
#   .sig01              NA        NA
# .sig02              NA        NA
# .sig03              NA        NA
# (Intercept) -4.1563742 -1.694469
# TypeS       -0.5761887  1.614506

# Quick look
plot(allEffects(m11))

# Check residuals
plot(m11)
rs <- DHARMa::simulateResiduals(m11)
plot(rs)

# Generate predictions for plotting
preds <- as.data.frame(predictorEffect("Type", m11))

# Generate predictions for random effect levels
rpreds <- as.data.frame(ggpredict(m11, c("Type", "Language"), type = "random"))

# Plot
tiff("/Users/pgr/Documents/Projects/Affix_phonology/affix_phonology/Images/allomorphy_by_type.tiff", units="in", width=3, height=5, res=300)
ggplot() +
  geom_pointrange(data = preds, aes(x = Type, y = fit, ymin = lower, ymax = upper)) +
  geom_errorbar(data = preds, aes(x = Type, y = fit, ymin = lower, ymax = upper), width = .05) +
  labs(y = "Odds of Allomorphy") +
  scale_x_discrete(labels=c("P" = "Prefixes", "S" = "Suffixes")) +
  theme(axis.title.x=element_blank()) +
  geom_line(data = preds, aes(x = Type, y = fit, group = 1), linetype = 3) +
  scale_y_log10(breaks = c(0.02, 0.04, 0.06, 0.08, 0.1, 0.12, 0.14))
dev.off()


### Number of allomorphs (>1) for prefixes vs. suffixes

# Create dataframe of only affixes with more than one allomorph
allomorphs <- data[data$Allomorphs > 1,]

# Check distribution of allomorphy across languages
summary(allomorphs$Language)

# Average each group
mean(allomorphs$Allomorphs[allomorphs$Type == 'P'])
# 2.339286
mean(allomorphs$Allomorphs[allomorphs$Type == 'S'])
# 2.340136

# Plot Allomorphs by Type
tiff("/Users/pgr/Documents/Projects/Affix_phonology/affix_phonology/Images/allomorphs_hist_by_type.tiff", units="in", width=4, height=3, res=300)
ggplot(allomorphs, aes(x = Allomorphs, group = Type, color = Type)) +
  geom_histogram(aes(y = after_stat(count / sum(count))), fill = "grey30", bins = 9,
                 data = ~ subset(., Type %in% c("P"))) +
  geom_histogram(aes(y = -after_stat(count / sum(count))), fill = "grey30", bins = 9,
                 data = ~ subset(., Type %in% c("S"))) +
  scale_color_manual(values = c("P" = "cyan2", "S" = "deeppink1"), labels=c('Prefixes', 'Suffixes')) +
  geom_hline(yintercept = 0, color = "grey30") +
  theme(legend.title=element_blank()) +
  scale_y_continuous(limits = c(-.8, .8), breaks = c(-0.5, 0, 0.5), labels = c("0.5", "0", "0.5")) +
  labs(y = "Proportion (within each affix type)", x = "Number of allomorphs")
dev.off()

## Basic statistical tests

# Wilcoxon rank sum test
wilcox.test(allomorphs$Allomorphs[allomorphs$Type == 'P'], allomorphs$Allomorphs[allomorphs$Type == 'S'], alternative = "two.sided")
# not significant, p = 0.931

# Kolmogorov-Smirnov test
ks.test(allomorphs$Allomorphs[allomorphs$Type == 'P'], allomorphs$Allomorphs[allomorphs$Type == 'S'], alternative = "two.sided")
# not significant, p = 0.965


### End
