# Supplementary material for: The interaction of affix size, type and shape: a cross-linguistic study
Source: publisher site journal article supplement (doi:10.1515/lingty-2024-0004), 2024-11-04
Supplement: Supplementary file 2 [file j_lingty-2024-0004_suppl_003.xlsx]

## Sheet: Database
Language	Family	ISO 639-3	Reference	Nucleus	Diphthongs	Relevant spelling conventions	Affixes	Allomorphs	Type	Syllables	Segments
Ashéninka Perené	Arawakan	prq	Mihas (2015: 657-659)	V (54)	/ia, io, ai, oi/ -- argued to be bimoraic; front vowels, not glides (39-40)	ty, sh, ch, ts = monosegmental (66-67)
							a-	1	P	1	1
							-a	1	S	1	1
							-a	1	S	1	1
							-acha,-atsi	2	S	2	3
							-ai	1	S	1	1
							-ai	1	S	1	1
							-aincha, -aintsi	2	S	2	4
							-aiy (-ni)	2	S	1.5	3
							-aj	1	S	1	2
							-ak	1	S	1	2
							-aka	1	S	2	3
							-ako	1	S	2	3
							-amampi	1	S	3	6
							-aman	1	S	2	4
							-an	1	S	1	2
							-aniki	1	S	3	5
							-ant	1	S	1	3
							-ant	1	S	1	3
							-ap	1	S	1	2
							-apaint	1	S	2	5
							-apanant	1	S	3	7
							-apint	1	S	2	5
							-apitsa	1	S	3	5
							-ashi	1	S	2	3
							-atai	1	S	2	3
							-aty, -atz	2	S	1	2
							-aty	1	S	1	2
							-av	1	S	1	2
							-avak	1	S	2	4
							-e	1	S	1	1
							i-	1	P	1	1
							-i	1	S	1	1
							-i	1	S	1	1
							-ia, -eya	2	S	1.5	2
							-ima(i)	2	S	2	3
							-nka	1	S	1	3
							-iriki	1	S	3	5
							-it	1	S	1	2
							-ite	1	S	2	3
							-ite	1	S	2	3
							-ite	1	S	2	3
							-jee (-ni)	2	S	1.5	3
							-ki	1	S	1	2
							-ki	1	S	1	2
							-mache	1	S	2	4
							-matsi	1	S	2	4
							-mento	1	S	2	5
							mi-	1	P	1	2
							-mi	1	S	1	2
							-na	1	S	1	2
							-ni	1	S	1	2
							-ni	1	S	1	2
							-ni	1	S	1	2
							-ni	1	S	1	2
							-ni	1	S	1	2
							-ni	1	S	1	2
							-ni	1	S	1	2
							-nint	1	S	1	4
							-nta	1	S	1	3
							-ntzi, -nto	2	S	1	3
							o-	1	P	1	1
							oi-, ov-, v-	3	P	0.7	1.3
							-patsaini	1	S	3	6
							-paye	1	S	2	4
							-pero, -piro	2	S	2	4
							-ri	1	S	1	2
							-ri	1	S	1	2
							-ri	1	S	1	2
							-ri	1	S	1	2
							-ro	1	S	1	2
							-ro	1	S	1	2
							-ront, -nont	2	S	1	4
							-satzi, -sato	2	S	2	4
							-taki	1	S	2	4
							-tanaki	1	S	3	6
							-te	1	S	1	1
							-(n)tsi	2	S	1	2.5
							-tsi	1	S	1	2
							-tzii	1	S	1	2
							-tzinkari, -tzinkaro	2	S	3	7
							-vai	1	S	1	2
							-ve, -vi	2	S	1	2
							-vent, -vint	2	S	1	4
							-veri, -vero	2	S	2	4
							-vintsa, -mintsa	2	S	2	5
							-ye	1	S	1	2
Ikpana	Atlantic-Congo	lgq	Dorvlo (2008: xv) -- based on TOC; no page number on page	V/N (11) -- bilabial/alveolar/velar Ns only, homorganic w/ next C, word-initial or -medial, in nouns only (12)	no V sequences in roots; no diphthongs across morpheme boundaries b/c belong to diff. syll.s (26)	kp, gb, ts, dz, ny = monosegmental (40)
							a-	1	P	1	1
							ani-	1	P	2	3
							ati-	1	P	2	3
							bó-, bá-, bɔ́-	3	P	1	2
							é-, á-, ɛ́-	3	P	1	1
							-go	1	S	1	2
							i-	1	P	1	1
							ma-	1	P	1	2
							n-	1	P	1	1
							o-, ɔ-	2	P	1	1
Vaeakau-Taumako	Austronesian	piv	Næss & Hovdhaugen (2011: 500-502)	V (22)	none (28)	kh, lh, mh, nh, ng, ngh, ph, th = monosegmental		1
							a-	1	P	1	1
							a-	1	P	1	1
							-a	1	S	1	1
							-akina	1	S	3	5
							ana-	1	P	2	3
							-anga	1	S	2	3
							-Cia	1	S	2	3
							fele-	1	P	2	4
							fia-	1	P	2	3
							fka-	1	P	1	3
							he-	1	P	1	2
							he-…-aki	1	O	3	5
							hie-	1	P	2	3
							hua-, haka-	2	P	2	3.5
							-i	1	S	1	1
							-i	1	S	1	1
							-ia	1	S	2	2
							-ina	1	S	2	3
							ko-	1	P	1	2
							-ku	1	S	1	2
							la-	1	P	1	2
							ma-	1	P	1	2
							-na	1	S	1	2
							-na	1	S	1	2
							-nga	1	S	1	2
							-nga	1	S	1	2
							okho-	1	P	2	3
							pa-	1	P	1	2
							taki-	1	P	2	4
							tatuko-	1	P	3	6
							tau-	1	P	2	3
							toko-	1	P	2	4
							-u	1	S	1	1
							va-	1	P	1	2
							va-, ve-	2	P	1	2
Gooniyandi	Bunaban	gni	McGregor (1990: 603-606)	V (90-93) -- indirect evidence: no mention of syllables w/o V	none (37)	aa, oo, dd, rd, rn, rl, th, nh, ny, ly, ng = monosegmental
							-a	1	S	1	1
							-a	1	S	1	1
							-addi	1	S	2	3
							-ani	1	S	2	3
							-arni	1	S	2	3
							-arni	1	S	2	3
							-badi	1	S	2	4
							-ban	1	S	1	3
							-bari	1	S	2	4
							bi-	1	P	1	2
							bi-	1	P	1	2
							-bi, -bili	2	S	1.5	3
							bidd-	1	P	1	3
							bidd-	1	P	1	3
							bin-	1	P	1	3
							-bindi	1	S	2	5
							-(b)ini	2	S	2	3.5
							-binyi	1	S	2	4
							-birli	1	S	2	5
							-(b)oo	2	S	1	2.5
							-da, -di	2	S	1	1
							-gali	1	S	2	2
							-gi	1	S	1	1
							-i	1	S	1	1
							iny-	1	P	1	2
							jadd-	1	P	1	3
							jan-	1	P	1	3
							ji-	1	P	1	2
							jidd-	1	P	1	3
							jin-	1	P	1	3
							-jinga	1	S	2	4
							-langi, -langoo	2	S	2	4
							li-	1	P	1	2
							-ma	1	S	1	2
							-marni	1	S	2	4
							-mawoo	1	S	2	4
							-mi	1	S	1	2
							-mi	1	S	1	2
							-mili	1	S	2	4
							ng-	1	P	0	1
							-ngaddi	1	S	2	4
							-ngarna	1	S	2	4
							ngg-	1	P	0	2
							-ngga	1	S	1	3
							nggi-	1	P	1	3
							nggidd-	1	P	1	4
							nggin-	1	P	1	4
							ngim-	1	P	1	3
							ngin-	1	P	1	3
							-nhingi	1	S	2	4
							ri-	1	P	1	2
							ri-	1	P	1	2
							-wa	1	S	1	2
							-wa	1	S	1	2
							-wadda	1	S	2	4
							-waddawadda	1	S	4	8
							-waddi	1	S	2	4
							-(w)ali	2	S	2	3.5
							-wanggoo	1	S	2	5
							-wanya	1	S	2	4
							-warni	1	S	2	4
							-warnoo	1	S	2	4
							wi-	1	P	1	2
							wi-	1	P	1	2
							-winya	1	S	2	4
							-woo	1	S	1	2
							-ya	1	S	1	2
							-yali	1	S	2	4
							-yangga	1	S	2	5
							-yarndi	1	S	2	5
							-yawoo	1	S	2	4
							-yayi	1	S	2	4
							-yayoo	1	S	2	4
							yi-	1	P	1	2
							-yidda	1	S	2	4
							-yiddi	1	S	2	4
							-yila	1	S	2	4
							-yoo	1	S	1	2
							-yooddoo	1	S	2	4
Tipai	Cochimi-Yuman	dih	Miller (2001: 373-376)	V (5), N (14) - /m/ only syllabic following stress; hence, a suffix /m/ may be syllabic, but a prefix /m/ may not; syllabic /n/ is only found in kinship terms; assuming that kinship terms do not include affixes, an affix of shape /n/ is not syllabic	ay, aay, aw, aaw, iw, iiw, uy, uuy (24)	tt, ll, ny, ch, sh, lly, ly, kw, xw, apostrophe, ii, uu, aa = monosegmental; y = /j/ (42)
							a-	1	P	1	1
							a-	1	P	1	1
							-a	1	S	1	1
							-a	1	S	1	1
							-a	1	S	1	1
							a'-	1	P	1	2
							aa-	1	P	1	1
							aa-	1	P	1	1
							aa-	1	P	1	1
							ch-	1	P	0	1
							ch-	1	P	0	1
							ch-, t-	2	P	0	1
							ch-	1	P	0	1
							-ch	1	S	0	1
							-ch	1	S	0	1
							-ch	1	S	0	1
							-ch	1	S	0	1
							ii-	1	P	1	1
							k-	1	P	0	1
							k-	1	P	0	1
							k-	1	P	0	1
							k-	1	P	0	1
							-k	1	S	0	1
							kw-	1	P	0	1
							kw-	1	P	0	1
							kw-	1	P	0	1
							kw-	1	P	0	1
							l-	1	P	0	1
							l-	1	P	0	1
							ll-	1	P	0	1
							ly-	1	P	0	1
							lly-	1	P	0	1
							lly-	1	P	0	1
							m-	1	P	0	1
							m-	1	P	0	1
							m-	1	P	0	1
							m-	1	P	0	1
							-m	1	S	0.5	1
							mat-, maat	2	P	1	3
							maa-	1	P	1	2
							n-	1	P	0	1
							n-	1	P	0	1
							n-	1	P	0	1
							ny-	1	P	0	1
							ny-	1	P	0	1
							ny-	1	P	0	1
							ny-	1	P	0	1
							ny…'-	1	P	0	2
							-ny	1	S	0	1
							nya-	1	P	1	2
							nya-	1	P	1	2
							nya-	1	P	1	2
							nyek…'-	1	P	1	4
							nyem-	1	P	1	3
							p-	1	P	0	1
							-p	1	S	0	1
							-p	1	S	0	1
							r-	1	P	0	1
							s-	1	P	0	1
							sh-	1	P	0	1
							sh-	1	P	0	1
							-sh	1	S	0	1
							t-	1	P	0	1
							t-	1	P	0	1
							t-	1	P	0	1
							uu-	1	P	1	1
							uu-	1	P	1	1
							uu-	1	P	1	1
							w-	1	P	0	1
							-wach	1	S	1	3
							-we	1	S	1	2
							x-	1	P	0	1
							-x	1	S	0	1
							-y	1	S	0	1
							ya-	1	P	1	2
							-ya	1	S	1	2
							'-	1	P	0	1
							'-	1	P	0	1
							ii-, ii'-	2	P	1	1.5
							ii-, ii'-	2	P	1	1.5
Garrwa	Garrwan	wrk	Mushin (2012: 469-470)	V (23)	none mentioned	rr, ny, ly, ng = monosegmental
							-ba	1	S	1	2
							-ba	1	S	1	2
							-(i)na	2	S	1.5	2.5
							-j	1	S	0	1
							-ji	1	S	1	2
							-jina	1	S	2	4
							-jiwa	1	S	2	4
							-ka	1	S	1	2
							-kanyi	1	S	2	4
							-kunu	1	S	2	4
							-kurri	1	S	2	4
							-(li)ji	2	S	1.5	3
							-(li)nya	2	S	1.5	4
							-m	1	S	0	1
							-ma	1	S	1	2
							-mba, -mbi	2	S	1	3
							-mirra	1	S	2	4
							-muku	1	S	2	4
							-munanyi	1	S	3	6
							-muwa	1	S	2	4
							-n	1	S	0	1
							-na	1	S	1	2
							-nanyi	1	S	2	4
							-nbana	1	S	2	5
							-nbu, -ndu	2	S	1	3
							-nbunanyi	1	S	3	7
							-(n)da	2	S	1	2.5
							-nganja	1	S	2	5
							-ngi	1	S	1	2
							-(ngi)ni	2	S	2	3
							-ngka	1	S	1	3
							-ngu	1	S	1	2
							-ni	1	S	1	2
							-(n)(ka)nyi	3	S	1.5	3.7
							-(n)(ku)rri	3	S	1.5	3.7
							-nya	1	S	1	2
							-nya	1	S	1	2
							-nyi	1	S	1	2
							-nyi	1	S	1	2
							-nyina	1	S	2	4
							-rra, -rri	2	S	1	2
							-rri	1	S	1	2
							-rrij	1	S	1	3
							-wa	1	S	1	2
							-wanyi	1	S	2	4
							-warr	1	S	1	3
							-wunyi	1	S	2	4
							-wuya	1	S	2	4
							-ya	1	S	1	2
							-yangka	1	S	2	5
							-yudi	1	S	2	4
							-(yu)rru	2	S	1.5	3
Toba	Guaicuruan	tob	Klein (1973: 271-276)	V (29, 31)	none mentioned	all single symbols seem to refer to a single segment (33)
							-a	1	S	1	1
							-aga	1	S	2	3
							-ayke	1	S	2	4
							-a'a	1	S	2	3
							-ega	1	S	2	3
							-get	1	S	1	3
							haka-	1	P	2	4
							haji-	1	P	2	4
							hana-	1	P	2	4
							hañi-	1	P	2	4
							hara-	1	P	2	4
							haso-	1	P	2	4
							hi-	1	P	1	2
							-igi	1	S	2	3
							-ište	1	S	2	4
							ja- -q	1	O	1	3
							ji-	1	P	1	2
							-ji	1	S	1	2
							ka-	1	P	1	2
							-ki	1	S	1	2
							-ki	1	S	1	2
							l-	1	P	0	1
							l-	1	P	0	1
							-l	1	S	0	1
							l…'-	1	O	0	2
							-le	1	S	1	2
							-lek	1	S	1	3
							-lek	1	S	1	3
							-lo	1	S	1	2
							n-	1	P	0	1
							n-	1	P	0	1
							n-	1	P	0	1
							-n	1	S	0	1
							n…'-	1	O	0	2
							n…'-	1	O	0	2
							na-	1	P	1	2
							na-	1	P	1	2
							-na	1	S	1	2
							na…'-	1	P	1	2
							ña-	1	P	1	2
							ña-	1	P	1	2
							ña…q-	1	O	1	3
							ñi-	1	P	1	2
							-ñi	1	S	1	2
							-o'	1	S	1	1
							-pe	1	S	1	2
							-q	1	S	0	1
							qan-	1	P	1	3
							qan…i-	1	O	2	4
							qan…i-	1	O	2	4
							qar-	1	P	1	3
							qar…i-	1	O	2	4
							qar…i-	1	O	2	4
							qaw…i-	1	O	2	4
							r-	1	P	0	1
							r…'-	1	O	0	2
							ra-	1	P	1	2
							-ro	1	S	1	2
							s-	1	P	0	1
							s…q-	1	O	0	2
							so-	1	P	1	2
							-ši	1	S	1	2
							-šigem	1	S	2	5
							-šik	1	S	1	3
							-tak	1	S	1	3
							-te	1	S	1	2
							-te	1	S	1	2
							-to	1	S	1	2
							-wa	1	S	1	2
							-wek	1	S	1	3
							-wo	1	S	1	2
							-'	1	S	0	1
							'an-	1	P	1	3
							'an-	1	P	1	3
							'ar-	1	P	1	3
							'ar-	1	P	1	3
							'aw-	1	P	1	3
							-'o	1	S	1	2
							-'oga	1	S	2	4
							-'ole	1	S	2	4
							-'olek	1	S	2	4
Yele	Isolate	yle	Levinson (2022: 80)	irrelevant	irrelevant	irrelevant
							-ni	1	S	1	2
							-pi	1	S	1	2
Lavukaleve	Isolate	lvk	Terrill (2003: 533-535)	V (28)	none (26)	ng = monosegmental
							a-	1	P	1	1
							a-	1	P	1	1
							-a	1	S	1	1
							-a	1	S	1	1
							-al	1	S	1	2
							-aol	1	S	2	3
							-aol	1	S	2	3
							-aul	1	S	2	3
							-ba	1	S	1	2
							e-	1	P	1	1
							e-	1	P	1	1
							e-	1	P	1	1
							-e	1	S	1	1
							-e	1	S	1	1
							-ev	1	S	1	2
							-ge	1	S	1	2
							-gel	1	S	1	3
							-ha	1	S	1	2
							-ham	1	S	1	3
							-i	1	S	1	1
							-i	1	S	1	1
							-ila	1	S	2	3
							-io	1	S	2	2
							-iva	1	S	2	3
							-kal	1	S	1	3
							-l	1	S	0	1
							-l	1	S	0	1
							la-	1	P	1	2
							la-	1	P	1	2
							-la	1	S	1	2
							-la	1	S	1	2
							le-	1	P	1	2
							le-	1	P	1	2
							le-	1	P	1	2
							-le	1	S	1	2
							lo-	1	P	1	2
							lo-	1	P	1	2
							lo-	1	P	1	2
							-m	1	S	0	1
							ma-	1	P	1	2
							-ma	1	S	1	2
							-mal	1	S	1	3
							-mal	1	S	1	3
							me-	1	P	1	2
							-me	1	S	1	2
							-mela	1	S	2	4
							mele-	1	P	2	4
							-meon	1	S	2	4
							-mil	1	S	1	3
							-n	1	S	0	1
							-n	1	S	0	1
							-n	1	S	0	1
							-na	1	S	1	2
							ne-	1	P	1	2
							-ne	1	S	1	2
							-ne	1	S	1	2
							-nen	1	S	1	3
							nga-	1	P	1	2
							ngo-	1	P	1	2
							-no	1	S	1	2
							-nol	1	S	1	3
							-nov	1	S	1	3
							-nu	1	S	1	2
							-nul	1	S	1	3
							-nun	1	S	1	3
							-nuv	1	S	1	3
							o-	1	P	1	1
							o-	1	P	1	1
							-o	1	S	1	1
							-ol	1	S	1	2
							-om	1	S	1	2
							-ov	1	S	1	2
							-re	1	S	1	2
							-re	1	S	1	2
							-ri	1	S	1	2
							-ri	1	S	1	2
							-ria	1	S	1	3
							-ril	1	S	1	3
							-ru	1	S	1	2
							-sa	1	S	1	2
							-v	1	S	0	1
							-va	1	S	1	2
							-vel	1	S	1	3
							-vele	1	S	2	4
							-verav	1	S	2	5
							-vil	1	S	1	3
							vo-	1	P	1	2
Savosavo	Isolate	svs	Wegener (2012: 359-386)	V (22)	/ai/ is debatable but mostly not (20-22)	gh, gn, ng = monosegmental		1
							-a	1	S	1	1
							-a	1	S	1	1
							-a	1	S	1	1
							-a	1	S	1	1
							-ale	1	S	2	3
							-ale	1	S	2	3
							-ata	1	S	2	3
							-atu	1	S	2	3
							-gha	1	S	1	2
							-gha	1	S	1	2
							-ghi	1	S	1	2
							-ghigni	1	S	2	4
							-ghu	1	S	1	2
							gn-	1	P	0	1
							-gni	1	S	1	2
							-i	1	S	1	1
							-i	1	S	1	1
							k-	1	P	0	1
							l-	1	P	0	1
							-le	1	S	1	2
							-li	1	S	1	2
							-lu	1	S	1	2
							m-	1	P	0	1
							-ma	1	S	1	2
							-mi	1	S	1	2
							-migni	1	S	2	4
							-mu	1	S	1	2
							n-	1	P	0	1
							-ni	1	S	1	2
							-nipiti	1	S	3	6
							p-	1	P	0	1
							-pi	1	S	1	2
							-sa	1	S	1	2
							t-	1	P	0	1
							-ti	1	S	1	2
							-tu	1	S	1	2
							-tu	1	S	1	2
							-va	1	S	1	2
							-vi	1	S	1	2
							-vigni	1	S	2	4
							z-	1	P	0	1
							-zu	1	S	1	2
Mangghuer	Mongolic-Khitan	mjg (closest relative)	Slater (2003: 367-372)	V (55)	none (32, 61)	gh, kh, ch, zh, sh, ng = monosegmental		1
							-a, -ya, -wa	3	S	1	1.7
							-ang	1	S	1	2
							-ba	1	S	1	2
							-bu	1	S	1	2
							-da	1	S	1	2
							-der	1	S	1	3
							-ge	1	S	1	1
							-ge	1	S	1	1
							-ge	1	S	1	1
							-gha	1	S	1	2
							-her	1	S	1	3
							-ji	1	S	1	2
							-ji	1	S	1	2
							-jiang	1	S	2	4
							-jinu	1	S	2	4
							-ke	1	S	1	2
							-ku	1	S	1	2
							-kuer	1	S	2	4
							-kunang	1	S	2	5
							-ku(ni)	2	S	1.5	3
							-kuniang	1	S	3	6
							-kuninu	1	S	3	6
							-la	1	S	1	1
							-la	1	S	1	1
							-la	1	S	1	1
							-lang	1	S	1	3
							-leinu	1	S	3	5
							-li	1	S	2	2
							-lie	1	S	2	3
							-luo	1	S	2	3
							-ni	1	S	1	2
							-ni	1	S	1	2
							-nu	1	S	1	2
							-pao	1	S	2	3
							-qin	1	S	1	3
							-ra	1	S	1	2
							-sang	1	S	1	3
							-sang(ni)	2	S	1.5	4
							-ser	1	S	1	3
							-tala	1	S	2	4
							-tiao	1	S	3	4
							-tu	1	S	1	2
							-tula	1	S	2	4
							-wa	1	S	1	2
							-ya	1	S	1	2
							-zhang	1	S	1	3
							-zhuan	1	S	2	4
Ik	Kuliak	ikx	Schrock (2014: xxv-xxvi)	V (58)	unclear, but in any case only found root-initially (50)	ts, ts', dz, tl', ɬ, lʒ, hy = monosegmental
							-a	1	S	1	1
							-a	1	S	1	1
							-aák	1	S	2	3
							-amá	1	S	2	3
							-án	1	S	1	2
							-aní	1	S	2	3
							-anó	1	S	2	3
							-ásí	1	S	2	3
							-áti	1	S	2	3
							-ɔ	1	S	1	1
							-ɔ	1	S	1	1
							-ɔnɪ	1	S	2	3
							-ɔ́sí	1	S	2	3
							-ɛ	1	S	1	1
							-ɛdɛ	1	S	2	3
							-ɛ́s	1	S	1	2
							-ɛ́s	1	S	1	2
							-ɛ́sɛ́	1	S	2	3
							-ɛ́sí	1	S	2	3
							-ɛt	1	S	1	2
							-ɛt	1	S	1	2
							-ɛ́	1	S	1	1
							-ɪ	1	S	1	1
							-í	1	S	1	1
							-ɪá	1	S	2	2
							-íɔ́	1	S	2	2
							-ídɪ	1	S	2	3
							-íí	1	S	2	2
							-ɪk	1	S	1	2
							-ɪka	1	S	2	3
							-íkó	1	S	2	3
							-ím	1	S	1	2
							-ɪmá	1	S	2	3
							-ɪmá	1	S	2	3
							-ímí	1	S	2	3
							-ínɔ́sí	1	S	3	5
							-inɛ́	1	S	2	3
							-ɪnɪ	1	S	2	3
							-ɪnɪ	1	S	2	3
							-ísínɪ	1	S	3	5
							-ɪt	1	S	1	2
							-ítí	1	S	2	3
							-ítíní	1	S	3	5
							-ka	1	S	1	2
							-kɔ	1	S	1	2
							-kɔ	1	S	1	2
							-kɛ	1	S	1	2
							-kɛ	1	S	1	2
							-nanesi	1	S	3	6
							-ʊƙɔtí	1	S	3	5
							-ʊƙɔtí	1	S	3	5
							-V́d	1	S	1	2
							-VƙV	1	S	2	3
							-V́m	1	S	1	2
							-V́m	1	S	1	2
							-Vma	1	S	2	3
							-'ka	1	S	1	2
Hup	Naduhup	jup	Epps (2008: 928-934)	V (78-9) -- not explicitly claimed but can safely be inferred	none (42, 79)	none		1
							-an	1	S	1	2
							-ăn	1	S	1	2
							-ănd'əh	1	S	2	6
							-áh	1	S	1	2
							-ay	1	S	1	2
							-Vcáp	1	S	2	4
							-cɨ̃p, -cɨ̃w	2	S	1	3
							-d'ăh	1	S	1	4
							-Vhə́ʔ	1	S	2	4
							hi-	1	P	1	2
							-hɔ̃(h)	2	S	1	2.5
							hup-	1	P	1	3
							-kamí	1	S	2	4
							-kæ̆m	1	S	1	4
							-kéʔ	1	S	1	3
							-kəd	1	S	1	3
							-kə́d	1	S	1	3
							-kodé	1	S	2	4
							-mah	1	S	1	3
							-mæh	1	S	1	3
							-ni	1	S	1	2
							-nɨ́h	1	S	1	3
							-n'ɨ̆h	1	S	1	4
							-nɨ̆ŋ	1	S	1	3
							-pog, -po, -wog, -wo	4	S	1	2.5
							-tæ̆n	1	S	1	3
							-tæ̃ʔ	1	S	1	3
							-teg	1	S	1	3
							-te	1	S	1	2
							-Vtiʔ	1	S	2	4
							-tuk, -tu	2	S	1	2.5
							-Vyá	1	S	2	3
							-yæ̃h	1	S	1	3
							-yɨ̃ʔ	1	S	1	3
							-yóʔ	1	S	1	3
							-ʔay	1	S	1	3
							-ʔeʔ, -ʔe	2	S	1	2.5
							-ʔeʔ	1	S	1	3
							-Vʔɨ̆h	1	S	2	4
							ʔũh-	1	P	1	3
							-ʔũh	1	S	1	3
							-ʔú̃h	1	S	1	3
							-V́h	1	S	1	2
							-Vp	1	S	1	2
							-V́t	1	S	1	2
							-Vw	1	S	1	2
							-V́y	1	S	1	2
							-Vyɨ́k	1	S	2	4
							-Vʔ	1	S	1	2
Iatmul	Ndu	ian	Jendraschek (2012: 552-556)	V (74)	ai, aai, au, aau, ou, ɨi	a', â', aa, i', uu, ch, k', kk, n', ny, p', tt = monosegmental
							-li', -ti', -a	3	S	1	1.7
							-li', -ti'	2	S	1	2
							-(n)a	2	S	1	1.5
							-ak	1	S	1	2
							-ba	1	S	1	2
							-kak	1	S	1	3
							-nala	1	S	2	4
							-o	1	S	1	1
							-okwi	1	S	2	4
							-budi'	1	S	2	4
							-da	1	S	1	2
							-ge	1	S	1	2
							-ki	1	S	1	2
							-klai	1	S	1	3
							kV-	1	P	1	2
							lV-	1	P	1	2
							-mi'na	1	S	2	4
							-pmâ	1	S	1	3
							sV-	1	P	1	2
							-tapman	1	S	2	6
							-vla	1	S	1	3
							vV-	1	P	1	2
							-da	1	S	1	2
							-ge	1	S	1	2
							-ula	1	S	2	3
							-vali	1	S	2	4
							-waaku	1	S	2	4
							-wak	1	S	1	3
							-saaku	1	S	2	4
							-sada	1	S	2	4
							-sage	1	S	2	4
							-seli, -sala	2	S	2	4
							-so	1	S	1	2
							-sola	1	S	2	4
							-gi'li'	1	S	2	4
							-jibu	1	S	2	4
							-ki'va	1	S	2	4
							-tabi'	1	S	2	4
							-tavi	1	S	2	4
							-si'bla	1	S	2	5
							-si'ki'k	1	S	2	5
							-vwali	1	S	2	5
							-yaki	1	S	2	4
							-a	1	S	1	1
							-aya	1	S	2	3
							-o	1	S	1	1
							-k	1	S	0	1
							-n	1	S	0	1
							-du	1	S	1	2
							-gu	1	S	1	2
							-a	1	S	1	1
							-aya	1	S	2	3
							-b	1	S	0	1
							-bi'k	1	S	1	3
							-d	1	S	0	1
							-di	1	S	1	2
							-guk	1	S	1	3
							-gw	1	S	0	2
							-j	1	S	0	1
							-kak	1	S	1	3
							-l	1	S	0	1
							-li	1	S	1	2
							-li	1	S	1	2
							-lu	1	S	1	2
							-m	1	S	0	1
							-mi'n	1	S	1	3
							-n	1	S	0	1
							-ni'n	1	S	0	3
							-ny	1	S	0	1
							-nyi'n	1	S	1	3
							-w	1	S	0	1
							-wun	1	S	1	3
							-ka	1	S	1	2
							-kakwi	1	S	2	5
							-laa	1	S	1	2
							-a	1	S	1	1
							a-	1	P	1	1
							-ay	1	S	1	2
							-ba	1	S	2	2
							-(k)a	2	S	1	1.5
							-(k)a	2	S	1	1.5
							-kiya, -ay	2	S	1.5	3
							-la	1	S	1	2
							-li'	1	S	1	2
							-n	1	S	0	1
							-vaak	1	S	1	3
Kenuzi-Dongola	Nubian	kzh	Abdel-Hafiz (1988: 316-317)	V (20)	none (19)	none
							a-	1	P	1	1
							-an	1	S	1	2
							-an	1	S	1	2
							-an(n)	2	S	1	2.5
							-ar	1	S	1	2
							-(a)r	2	S	0.5	1.5
							bi-	1	P	1	2
							-bu:	1	S	1	2
							-de:n	1	S	1	3
							-do	1	S	1	2
							-el	1	S	1	2
							-ga	1	S	1	2
							-gen	1	S	1	3
							-gi	1	S	1	2
							-go	1	S	1	2
							-go:n	1	S	1	3
							-gu	1	S	1	2
							-i	1	S	1	1
							-i	1	S	1	1
							-id	1	S	1	2
							-iddi	1	S	2	4
							-il	1	S	1	2
							-ir	1	S	1	2
							-ir	1	S	1	2
							-ka	1	S	1	2
							-ke	1	S	1	2
							-ki	1	S	1	2
							-kiddi	1	S	2	5
							-kinny	1	S	1	5
							-kir	1	S	1	3
							-ko:	1	S	1	2
							-ma	1	S	1	2
							-me:(n)	2	S	1	2.5
							-n	1	S	0	1
							-n(a)	2	S	0.5	1.5
							-nu	1	S	1	2
							-o(s)	2	S	1	1.5
							-r	1	S	0	1
							-re	1	S	1	2
							-r(o)	2	S	0.5	1.5
							-s	1	S	0	1
							-takki	1	S	2	5
							-itti	1	S	2	4
							-tir	1	S	1	3
							-ti	1	S	1	2
							-we	1	S	1	2
							-we:r	1	S	1	3
Yeri	Nuclear Torricelli	yev	Wilson (2017: 667-674)	V (65)	none, but non-committal (71)	y, w are glide allophones of high Vs
							-p-	1	O	0	1
							-pa-	1	O	1	2
							-pe-	1	O	1	2
							-pa, -pɨ, -ba, -bo	4	S	1	2
							-ha	1	S	1	2
							-ka	1	S	1	2
							-a, -e, -wa, -we	4	S	1	1.5
							-a	1	S	1	1
							-ua	1	S	2	2
							-u	1	S	1	1
							-ha	1	S	1	2
							-he-	1	O	1	2
							-i	1	S	1	1
							-m-	1	O	0	1
							-ma-	1	O	1	2
							-me-	1	O	1	2
							-ma, -me, -mɨ	3	S	1	2
							-gal, -gɨl	2	S	1	3
							tɨ-	1	P	1	2
							-m	1	S	0	1
							-n	1	S	0	1
							-na	1	S	0	2
							-ne-	1	O	1	2
							b-	1	P	0	1
							w-	1	P	0	1
							y-	1	P	0	1
							-agia	1	S	3	4
							-aguei	1	S	4	5
							-(l)bia	2	S	2	3.5
							-ei	1	S	2	2
							-gi	1	S	1	2
							-hegal	1	S	2	5
							-hi-	1	O	1	2
							-i-	1	O	1	1
							-i	1	S	1	1
							-(e)gal, -gɨl	3	S	1.3	3.3
							-ia	1	S	2	2
							-l	1	S	0	1
							-m	1	S	0	1
							-megal	1	S	2	5
							-mi	1	S	1	2
							-pegal	1	S	2	5
							-wɨl	1	S	1	3
							-(e)tɨ, -ta	3	S	1.3	2.3
							-l	1	S	0	1
							-l(a)	2	S	0.5	1.5
							m-	1	P	0	1
							h-	1	P	0	1
							n-	1	P	0	1
							n-	1	P	0	1
							w-	1	P	0	1
							w-	1	P	0	1
							y-	1	P	0	1
							d-	1	P	0	1
							-ki	1	S	1	2
Nhanda	Pama-Nyungan	nha	Blevins (2001: 152-153)	V (18)	none mentioned	th, dh, nh, lh, yh, rt, rn, rd, rl, ny, ly, ng = monosegmental
							-a	1	S	1	1
							-ba	1	S	1	2
							-bagaa	1	S	2	4
							-bardu	1	S	2	4
							-barta	1	S	2	4
							-buraada	1	S	3	6
							-caa	1	S	1	2
							-cada	1	S	2	4
							-cadi	1	S	2	4
							-cu	1	S	1	2
							-ga	1	S	1	2
							-ganu	1	S	2	4
							-gayi	1	S	2	4
							-gurtku	1	S	2	5
							-i	1	S	1	1
							-jada	1	S	2	4
							-jada	1	S	2	4
							-jadi	1	S	2	4
							-jata	1	S	2	4
							-jati	1	S	2	4
							-ka	1	S	1	1
							-lada	1	S	2	4
							-lu	1	S	1	2
							-na	1	S	1	2
							-nda	1	S	1	3
							-nda	1	S	1	3
							-ndha	1	S	1	4
							-ndha	1	S	1	4
							-nganu	1	S	2	4
							-ngga	1	S	1	3
							-nggalu	1	S	2	5
							-nggu	1	S	1	3
							-nggu	1	S	1	3
							-nggu	1	S	1	3
							-nggula	1	S	2	5
							-ngu	1	S	1	2
							-nha	1	S	1	2
							-nha	1	S	1	2
							-nha	1	S	1	2
							-nhaa	1	S	1	2
							-nhii	1	S	1	2
							-nu	1	S	1	2
							-nu	1	S	1	2
							-nygu	1	S	1	3
							-nyida	1	S	2	4
							-nyinda	1	S	2	5
							-nyja	1	S	1	3
							-ra	1	S	1	2
							-rnda	1	S	1	3
							-tha	1	S	1	2
							-thada	1	S	2	4
							-wa	1	S	1	2
							-waa	1	S	1	2
							-wana	1	S	2	4
							-wu	1	S	1	2
							-yana	1	S	2	4
							-yu	1	S	1	2
Yakkha	Sino-Tibetan	ybh	Schackow (2015: 565-568)	V (51)	ai, ui, oi, au	ch, ph, th, kh, wh, mh, nh, ŋh, bh, dh, gh = monosegmental
							a-	1	P	1	1
							-a	1	S	1	1
							-a	1	S	1	1
							-a	1	S	1	1
							-(n)a	2	S	1	1.5
							-ap	1	S	1	2
							-apt	1	S	1	3
							anciŋ-	1	P	2	5
							aniŋ-	1	P	2	4
							-bhes	1	S	1	3
							-bhoks, -bhoŋ	2	S	1	3.5
							-ca	1	S	1	2
							-ci(n)	2	S	1	2.5
							-ci	1	S	1	2
							-eba	1	S	2	3
							eN-	1	P	1	2
							-end	1	S	1	3
							enciŋ-	1	P	2	5
							-get	1	S	1	3
							-(g)het	2	S	1	3
							-ghond	1	S	1	4
							-haks, -nhaŋ	2	S	1	3.5
							-heks	1	S	1	4
							-(n)i	2	S	1	1.5
							-i(n)	2	S	1	1.5
							-ka	1	S	1	2
							-kheʔ	1	S	1	4
							-khuba	1	S	2	4
							-khusa	1	S	2	4
							-les	1	S	1	3
							-lo	1	S	1	2
							-loʔa	1	S	2	4
							-m	1	S	0	1
							-ma	1	S	1	2
							-ma	1	S	1	2
							-ma	1	S	1	2
							-ma, -mi	2	S	1	2
							-masa, -misi	2	S	2	4
							meN-	1	P	1	3
							meN-…-le	1	O	2	5
							-met	1	S	1	3
							-meʔ	1	S	1	3
							N-	1	P	0	1
							N-	1	P	0	1
							N-	1	P	0	1
							-n	1	S	0	1
							-nen	1	S	1	3
							-nes	1	S	1	3
							-nhaŋto	1	S	2	5
							-ni	1	S	1	2
							-nin	1	S	1	3
							njiŋ-	1	P	1	4
							nniŋ-	1	P	1	4
							-ŋ(a)	2	S	0.5	1.5
							-pa	1	S	1	2
							-paŋ	1	S	1	3
							-piʔ	1	S	1	3
							-raʔ	1	S	1	3
							-raʔ	1	S	1	3
							-ris	1	S	1	3
							-sa	1	S	1	2
							-saŋ	1	S	1	3
							-se	1	S	1	2
							-siʔ	1	S	1	3
							-siʔ	1	S	1	3
							-siʔ	1	S	1	3
							-soʔ	1	S	1	3
							-t	1	S	0	1
							u-	1	P	1	1
							-u	1	S	1	1
							-uks	1	S	1	3
							-uks, -nuŋ	2	S	1	3
							-uks, -nuŋ	2	S	1	3
							-uks, -uksa	2	S	1.5	3.5
							-ukt	1	S	1	3
							uŋci-	1	P	2	4
							-wa	1	S	1	2
Tagdal	Songhay	tda	Benítez-Torres (2021: xiv-xvi)	V (15) -- argument based on frequency, not structure	none mentioned	tʃ, dʒ, ii, ee, aa, oo, uu = monosegmental
							a-	1	P	1	1
							-an, -en, -wan, -tan	4	S	1	2.5
							-an, -nan	2	S	1	2.5
							b-	1	P	0	1
							ə-	1	P	1	1
							i-	1	P	1	1
							-kat	1	S	1	3
							m-	1	P	0	1
							-ma	1	S	1	2
							-nan	1	S	1	3
							nə-	1	P	1	2
							nəm-	1	P	1	3
							-nén	1	S	1	3
							-nen	1	S	1	3
							s-, ʃ-, z-, ʒ-	4	P	0	1
							sə-	1	P	1	2
							t-	1	P	0	1
							tə-	1	P	1	2
							təw-	1	P	1	3
							-yen	1	S	1	3
Tohono O'odham	Uto-Aztecan	ood	Zepeda (1983: 158-160)	no information provided; assumption for our classification is that nasals and other Cs are not possible nuclei, but this should be stated explicitly since there are several orthographically nasal-only prefixes	ai, ei, oi, ui	none
							-ad	1	S	1	2
							-'i	1	S	1	2
							-iñ	1	S	1	2
							-kud	1	S	1	3
							-ga	1	S	1	2
							-mad	1	S	1	3
							-pig	1	S	1	3
							ñ-	1	P	0	1
							m-	1	P	0	1
							t-	1	P	0	1
							'em-	1	P	1	3
							ha-	1	P	1	2
							ñ-	1	P	0	1
							m-	1	P	0	1
							-ij	1	S	1	2
							-j	1	S	1	1
							t-	1	P	0	1
							'em-	1	P	1	3
							ha-	1	P	1	2
							ñ-	1	P	0	1
							m-	1	P	0	1
							ha-	1	P	1	2
							t-	1	P	0	1
							'em-	1	P	1	3
							ha-	1	P	1	2
							ñ-	1	P	0	1
							'e-	1	P	1	2
							'e-	1	P	1	2
							t-	1	P	0	1
							'e-	1	P	1	2
							'e-	1	P	1	2
Kalamang	West Bomberai	kgv	Visser (2022: 443-444)	V (70)	non-committal; /i/- and /u/-final VV sequences can surface as diphthongs	ng = monosegmental
							-ahutak	1	S	3	6
							-an	1	S	1	2
							-bes	1	S	1	3
							-ca, -ja, -ya	3	S	1	2
							-ce, -je, -ye	3	S	1	2
							-et	1	S	1	2
							-(ng)gan	2	S	1	3.5
							-i	1	S	1	1
							-mahap	1	S	2	5
							-mun	1	S	1	3
							-mur	1	S	1	3
							-naninggan	1	S	3	8
							-ndi	1	S	1	3
							-pe, -we, -be	3	S	1	2
							-re	1	S	1	2
							-rip	1	S	1	3
							-sen	1	S	1	3
							-te, -de, -re	3	S	1	2
							-un	1	S	1	2
							-un	1	S	1	2
							al-	1	P	1	2
							ar-	1	P	1	2
							ep-, ew-	2	P	1	2
							et-, er-	2	P	1	2
							kis-	1	P	1	3
							mir-	1	P	1	3
							na(k)-	2	P	1	2.5
							nar-	1	P	1	3
							pel-	1	P	1	3
							poup-, pouw-	2	P	1	4
							pur-	1	P	1	3
							rur-	1	P	1	3
							taba(k)-	2	P	2	4.5
							ta(k)-	2	P	1	2.5
							tang-	1	P	1	3
							tep-, tew-	2	P	1	3
Totonac (Filomeno Mata)	Totonacan	tlp	McFarland (2009: 240-244)	V (24)	none mentioned	ts, tl, ii, uu, aa = monosegmental
							'ak-	1	P	1	3
							'amaq-	1	P	2	5
							'aq-	1	P	1	3
							'aqa-	1	P	2	4
							'aqa-	1	P	2	4
							'aqłčaa-	1	P	2	6
							'aqsti-	1	P	2	6
							-(VV)n, -n'i	3	S	0.7	2.3
							-a'a, -V'V	2	S	2	3
							-aa	1	S	1	1
							čaa-	1	P	1	2
							čaa-	1	P	1	2
							čaaspi-	1	P	2	5
							-ča'a	1	S	2	4
							-či	1	S	1	2
							-čita	1	S	2	4
							-ii, -VV	2	S	1	1
							k-	1	P	0	1
							k-	1	P	0	1
							ka-	1	P	1	2
							kaa-	1	P	1	2
							kaa-	1	P	1	2
							-kan	1	S	1	3
							-kan	1	S	1	3
							kii-	1	P	1	2
							kil-	1	P	1	3
							kił-	1	P	1	3
							kilmak-	1	P	2	6
							kiłpi-	1	P	2	5
							kił'ak-	1	P	2	6
							kin-	1	P	1	3
							kinka-	1	P	2	5
							kušmu-	1	P	2	5
							-kutun	1	S	2	5
							laa-	1	P	1	2
							laa-	1	P	1	2
							lak-	1	P	1	2
							lak-	1	P	1	2
							lak-, laq-	2	P	1	3
							laka-	1	P	2	4
							laka-, laqa-	2	P	2	4
							lakpi-	1	P	2	5
							laq-	1	P	1	3
							laqa-	1	P	2	4
							laqšti-	1	P	2	6
							-li	1	S	1	2
							lii-	1	P	1	2
							liičaa-	1	P	2	4
							liiqała-	1	P	3	6
							-maa	1	S	1	2
							maa-	1	P	1	2
							mak-	1	P	1	3
							maka-, maqa-	2	P	2	4
							makapiš-	1	P	3	7
							maq-	1	P	1	3
							maq-	1	P	1	3
							maq-	1	P	1	3
							maq(a)-	2	P	1.5	3.5
							maqšpa-	1	P	2	6
							mi(n)-	2	P	1	2.5
							-mii	1	S	1	2
							muu(šti)-	2	P	1.5	3.5
							-n(i)	2	S	0.5	1.5
							na-	1	P	1	2
							na-	1	P	1	2
							-na'a, -nV'V	2	S	2	4
							-nan	1	S	1	3
							-nan, -nVn	2	S	1	3
							-ni	1	S	1	2
							-nii	1	S	1	2
							-nii(ta)	2	S	1.5	3
							-paa	1	S	1	2
							paa-	1	P	1	2
							paa-	1	P	1	2
							-para	1	S	2	4
							peeq-	1	P	1	3
							peeqštu-	1	P	2	6
							peqee-	1	P	2	4
							-pi	1	S	1	2
							-pii	1	S	1	2
							piš-	1	P	1	3
							piš-	1	P	1	3
							pooqał-	1	P	2	5
							puu-	1	P	1	2
							puu-	1	P	1	2
							puu-	1	P	1	2
							puu-	1	P	1	2
							puu'ak-	1	P	2	5
							puulak-	1	P	2	5
							qaapi-	1	P	2	4
							qaapiš-	1	P	2	5
							qal-	1	P	1	3
							qaltsan-	1	P	2	6
							qał-	1	P	1	3
							qan-	1	P	1	3
							qanqa-	1	P	2	5
							-qe'e	1	S	2	4
							qee-	1	P	1	2
							qee-	1	P	1	2
							-qo'o	1	S	2	4
							-qš	1	S	0	2
							š(a)-	2	P	0.5	1.5
							š-	1	P	0	1
							ša-	1	P	1	2
							ša-	1	P	1	2
							sih-	1	P	1	3
							stiipu-	1	P	2	5
							ta-	1	P	1	2
							ta-	1	P	1	2
							taa-	1	P	1	2
							taa-	1	P	1	2
							tamp(un)a-	2	P	2.5	6
							tan-	1	P	1	3
							tan-, tank-, tanq-	3	P	1	3.3
							tančaaspi-	1	P	3	8
							tankił(a)-	2	P	2.5	6.5
							tantu-, tuu-	2	P	1.5	3.5
							-ti	1	S	1	2
							-ti	1	S	1	2
							-ti	1	S	1	2
							ti-	1	P	1	2
							tii-	1	P	1	2
							-tiiła	1	S	2	4
							-titi	1	S	2	4
							-tiyu'u	1	S	3	6
							-tu	1	S	1	2
							tuu-	1	P	1	2
							tuu-	1	P	1	2
							-wa	1	S	1	2
Paraguayan Guaraní	Tupian	gug	Estigarribia (2020: 309-311)	V (35)	yes; many combinations; always include high vowel glide at beginning or end (29-30)	ch, mb, nd, ng, nt, rr (jh?, qu?) = monosegmental
							n(d)(a/e/o)…(r)i	10	O	1.5	3
							n(d)e…va	2	O	2	4
							ja…ma	1	O	2	4
							a-, (r)e-, o-	4	P	1	1.3
							ja-, ña-, ro-, pe-	4	P	1	2
							e-	1	P	1	1
							ro-	1	P	1	2
							po-	1	P	1	2
							che-, n(d)e-	3	P	1	2
							i-, ij-, iñ-, hi-	4	P	1	1.8
							ñan(d)e-, ore-, pen(d)e-	5	P	2	3.7
							mba'e-	1	P	2	4
							poro-	1	P	2	4
							m(b)o-	2	P	1	2
							gue-, re-	2	P	1	2
							(gue)ro-	2	P	1.5	3
							jo-	1	P	1	2
							je-	1	P	1	2
							eko-	1	P	2	3
							em(b)i	2	P	2	3
							t-	1	P	0	1
							t-, h-, r-	3	P	0	1
							-(e)te-, -(i)te	4	S	1.5	2.5
							-(e)terei-, -(i)terei	4	S	2.5	4.5
							-ha	1	S	1	2
							-ha	1	S	1	2
							-hára	1	S	2	4
							-harã	1	S	2	4
							-hare	1	S	2	4
							-je	1	S	1	2
							-ke	1	S	1	2
							-kue, -ngue	2	S	1	2
							-kue, -ngue	2	S	1	2
							-ma	1	S	1	2
							-mante	1	S	2	4
							-mi	1	S	1	2
							-mi	1	S	1	2
							-mi	1	S	1	2
							-mo'ã	1	S	2	4
							-na	1	S	1	2
							-ne	1	S	1	2
							-nga'u	1	S	2	4
							-nte	1	S	1	2
							-pa, -mba	2	S	1	2
							-pavẽ	1	S	2	4
							-pota, -mbota	2	S	2	4
							-py	1	S	1	2
							-py(ra), -(mby)ra	4	S	1.5	3
							-pyrã, -mbyrã	2	S	2	4
							-pyre, -mbyre	2	S	2	4
							-rã	1	S	1	2
							-rasa	1	S	2	4
							-re	1	S	1	2
							-rei	1	S	1	2
							-se	1	S	1	2
							-ta	1	S	1	2
							-t(e)i	2	S	1	2
							-tee	1	S	1	1
							-ty, -ndy	2	S	1	1
							-uka	1	S	2	2
							-va	1	S	1	1
							-va	1	S	1	1
							-va(')erã	2	S	3	3
							-va(')ekue	2	S	3	3
							-ve	1	S	1	1
							-vete	1	S	2	2
							-vo	1	S	1	1
							-vusu	1	S	2	2
							-vy, -ngy	2	S	1	1
							-'i	1	S	1	1
							-'o	1	S	1	1
							-'ỹ, -ỹre(he), -rehe'ỹ	4	S	1.5	3.8
Laki	Indo-European	lki	Belelli (2021: 459-465)	V (60)	none (59)	<y> = /j/ (ix)
							-a, -ka	2	S	1	1.5
							-a, -e	2	S	1	1
							-al, -el, -il, -l	4	S	0.75	1.75
							-ał	1	S	1	2
							-ā	1	S	1	1
							-ān	1	S	1	2
							-āt, -jāt	2	S	1	2.5
							b-, bi-	2	P	0.5	1.5
							-ča	1	S	1	2
							-e, -ī, -īk	3	S	1	1.3
							-e, -et, -ī, -īt, -y, -yt	6	S	0.67	1.5
							-h, -hā	2	S	0.5	1.5
							-im, -am, -m	3	S	0.67	1.67
							-im, -om	2	S	1	2
							-imīn, -omīn	2	S	2	4
							-in, -an, -n	3	S	0.67	1.67
							-in, -n	2	S	0.5	1.5
							-in	1	S	1	2
							-in	1	S	1	2
							-ir	1	S	1	2
							-ī, -īt, -t, -y, -yt	5	S	0.4	1.4
							-ī	1	S	1	1
							-ī	1	S	1	1
							-īmin, -īm, -ym, -ymin, -min	5	S	1	3
							-īn, -yn	2	S	0.5	2
							-ītin, -ytin, -tin	3	S	1.3	3.67
							ma-, m-	2	P	0.5	1.5
							ma-	1	P	1	2
							-n, -in	2	S	0.5	1.5
							na-, n-	2	P	0.5	1.5
							ni-	1	P	1	2
							-tir, -tirik	2	S	1.5	4
							-tirīn, -tarīn	2	S	2	5
Lezgian	Nakh-Daghestanian	lez	Haspelmath (1993: 557-559)	V (46)	none (31-32)	Cw = labialized C (30); capital vowel letters for VH: A = /a, e/, U = /e, i, y/ (56)
							-a	1	S	1	1
							-a	1	S	1	1
							-A	2	S	1	1
							-A	2	S	1	1
							-A	2	S	1	1
							-Aba	2	S	2	3
							Ac-	2	P	1	2
							-Adi	2	S	2	3
							Ag-	2	P	1	2
							AgAl-	2	P	2	4
							-aj	1	S	1	2
							-aj	1	S	1	2
							-aj	1	S	1	2
							Ak-	2	P	1	2
							Al-	2	P	1	2
							-Aldi	2	S	2	4
							-an	1	S	1	2
							Aq̃-	2	P	1	2
							Aq'Al-	2	P	2	4
							-ar	1	S	1	2
							-ar	1	S	1	2
							-Ar	2	S	1	2
							-Arar	2	S	2	4
							Aw-	2	P	1	2
							-äj	1	S	1	2
							-ba-	1	O	1	2
							-ban	1	S	1	3
							bej-	1	P	1	3
							-bur	1	S	1	3
							-cí, -c'i	2	S	1	2
							-čí	1	S	1	2
							-čí, -č'í	2	S	1	2
							-da	1	S	1	2
							-da	1	S	1	2
							-da	1	S	1	2
							-dakaz	1	S	2	5
							-daldi	1	S	2	5
							-di	1	S	1	2
							-di	1	S	1	2
							-di	1	S	1	2
							-di	1	S	1	2
							-di	1	S	1	2
							-diz	1	S	1	3
							-er	1	S	1	2
							-er	1	S	1	2
							gAl-	2	P	1	3
							-gan	1	S	1	3
							gw-	1	P	0	1
							h-	1	P	0	1
							hAl-	2	P	1	3
							-i	1	S	1	1
							-ijar	1	S	2	4
							-in	1	S	2	2
							-ini	1	S	2	3
							-ir	1	S	1	2
							-iz	1	S	1	2
							-j	1	S	0	1
							-j	1	S	0	1
							-j	1	S	0	1
							-ja	1	S	1	2
							-jar	1	S	1	3
							-ji	1	S	1	2
							-k	1	S	0	1
							-kaj	1	S	1	3
							kAk-	2	P	1	3
							-kdi	1	S	1	3
							kw-	1	P	0	1
							-k'a	1	S	1	2
							-l	1	S	0	1
							-la	1	S	1	2
							-la	1	S	1	2
							-laj	1	S	1	3
							-lamiš	1	S	2	2
							-lAr	2	S	1	3
							-lda	1	S	1	3
							-ldi	1	S	1	3
							-lu	1	S	1	2
							-lux	1	S	1	3
							-mir	1	S	1	3
							-n	1	S	0	1
							-n	1	S	0	1
							-n	1	S	0	1
							-n	1	S	0	1
							-na	1	S	1	2
							-na	1	S	1	2
							-n(a)ma	2	S	1.5	3.5
							-n(a)maz(di)	4	S	2	5.5
							-n(a)wa	2	S	1.5	3.5
							-ni	1	S	1	2
							-ni	1	S	1	2
							q̃Aq̃-	2	P	1	3
							-qʰ	1	S	0	1
							-qʰ(i)	2	S	0.5	1.5
							-qʰaj	1	S	1	3
							-qʰan	1	S	1	3
							-qʰdi	1	S	1	3
							-r	1	S	0	1
							-r	1	S	0	1
							-r	1	S	0	1
							-ra	1	S	1	2
							-ra	1	S	1	2
							-rA	2	S	1	2
							-raj	1	S	1	3
							-rdawaj	1	S	2	6
							-ri	1	S	1	2
							-suz	1	S	1	3
							tA-	2	P	1	2
							-t'a	1	S	1	2
							-u	1	S	1	1
							-U	3	S	1	1
							-U	3	S	1	1
							-U	3	S	1	1
							-uj	1	S	1	2
							-un	1	S	1	2
							-Uni	3	S	2	3
							-ur	1	S	1	2
							-w	1	S	0	1
							-waj	1	S	1	3
							-wal	1	S	1	3
							-wal	1	S	1	3
							-waldi	1	S	2	5
							-wdi	1	S	1	3
							-wi	1	S	1	2
							-wiläj	1	S	2	5
							-x-	1	O	0	1
							-xana	1	S	2	4
							xk-	1	P	1	2
							x(U)-	4	P	0.75	1.75
							-z	1	S	0	1
							-z(a)ma	2	S	1.5	3.5
							-z(a)maz	2	S	1.5	4.5
							-z(a)wa	2	S	1.5	3.5
							-ží	1	S	1	2

## Sheet: Additional data
Language	Family	ISO 639-3	Reference	Nucleus	Diphthongs	Relevant spelling conventions	Affixes	Type	Syllables	Segments
Parecís	Arawakan	pab	Barros Brandão (2014)	V (52)	/oa, ae, oe, ai, ei, oi, ao/ -- first three are definitely diphthongs; latter two could also be V + glide (53), but ultimately argued to be diphthongs after all	ty, ly, ts, tx = monosegmental (73)
							a-	P	1	1
							ka-	P	1	2
							ma-	P	1	2
							z-	P	0	1
							-ne/-ra/-za	S	1	2
							-ti	S	1	2
							-nae	S	1	2
							-ita	S	2	3
							-hena	S	2	4
							-heta	S	2	4
							-ka	S	1	2
							-tya	S	1	2
							-kakoa	S	2	4
							-i/-ki	S	1	1.5
							-(ty)oa	S	1	1.5
							-wi	S	1	2
							-ore	S	2	3
							-ha	S	1	2
Galibi Carib	Cariban	car	Courtz (2008: 441-444)	V (23)	none (23, fn. 81): two phonemes, one nucleus -- debatable	apostrophe = single segment, y = V
							a-	P	1	1
							ani-	P	2	3
							ase-	P	2	3
							i-	P	1	1
							-i	S	1	1
							-imo	S	2	3
							-ine	S	2	3
							-ja	S	1	2
							-jaine	S	2	5
							-jakon	S	2	5
							-jamon	S	2	5
							-jan (1)	S	1	3
							-jan (2)	S	1	3
							-jatoine	S	3	7
							-jatokon	S	3	7
							-jaton	S	2	5
							-je (1)	S	1	2
							-je (2)	S	1	2
							-jen	S	1	3
							-ka	S	1	2
							-kama	S	2	4
							-kamon	S	2	5
							-kan	S	1	3
							-ke	S	1	2
							-ken	S	1	3
							-kepy (1)	S	2	4
							-kepy (2)	S	2	4
							-ko	S	1	2
							-kon (1)	S	1	3
							-kon (2)	S	1	3
							ky- (1)	P	1	2
							ky- (2)	P	1	2
							kysi-	P	2	4
							kyt-	P	1	3
							m-	P	0	1
							-ma	S	1	2
							-'ma (1)	S	1	3
							-'ma (2)	S	1	3
							-'makon	S	2	6
							-mamy	S	2	4
							-'me	S	1	3
							-menan	S	2	5
							-mene	S	2	4
							mi-	P	1	2
							-mpo	S	1	3
							-mpoto	S	2	5
							-my	S	1	2
							-myn	S	1	3
							-n	S	0	1
							-naka	S	2	4
							-namon (1)	S	2	5
							-namon (2)	S	2	5
							-nan	S	1	3
							-nano	S	2	4
							-ne	S	1	2
							-nen (1)	S	1	3
							-nen (2)	S	1	3
							ni-	P	1	2
							-no (1)	S	1	2
							-no (2)	S	1	2
							-non (1)	S	1	3
							-non (2)	S	1	3
							-'non	S	1	4
							-nopy	S	2	4
							-numy	S	2	4
							o-	P	1	1
							-pa	S	1	2
							-'pa	S	1	3
							-pamy	S	2	4
							-po (1)	S	1	2
							-po (2)	S	1	2
							-'po	S	1	3
							-poty	S	2	4
							-pyn	S	1	3
							-ramon	S	2	5
							-ran	S	1	3
							-re	S	1	2
							-ren	S	1	3
							-ro	S	1	2
							-ry (1)	S	1	2
							-ry (2)	S	1	2
							-ryine	S	2	5
							-'san	S	1	4
							-'se	S	1	3
							-sen	S	1	3
							-senan	S	2	5
							-sene	S	2	4
							si-	P	1	2
							-ta	S	1	2
							-take	S	2	4
							-tamy	S	2	4
							-tan	S	1	3
							-tàton	S	2	5
							-to (1)	S	1	2
							-to (2)	S	1	2
							-to (3)	S	1	2
							-'to (1)	S	1	3
							-'to (2)	S	1	3
							-toine	S	2	5
							-toko	S	2	4
							-tòkòman	S	3	7
							-tòkòme	S	3	6
							-tokon	S	2	5
							-tòkon	S	2	5
							-tòman	S	2	5
							-tòme	S	2	4
							-ton (1)	S	1	3
							-ton (2)	S	1	3
							-tono	S	2	4
							-tonon	S	2	5
							-topo	S	2	4
							-tory	S	2	4
							-toryine	S	3	7
							-tòse	S	2	4
							-toto	S	2	4
							ty-	P	1	2
							-ty	S	1	2
							w-	P	0	1
							y-	P	1	1
Rotokas	North Bougainville	roo	Robinson (2011: 320-323)	V (28)	none mentioned	aa, ee, ii, oo, uu = monosegmental
							ora-	P
							o-	P
							s-	P
							vo-	P
							-arapa	S
							-ara	S
							-arei	S
							-aro	S
							-a	S
							-ba	S
							-ea	S
							-ei	S
							-epa	S
							-erao	S
							-era	S
							-erei	S
							-ere	S
							-e	S
							-ia	S
							-io	S
							-irao	S
							-irara	S
							-iva	S
							-i	S
							-oro	S
							-o	S
							-pa	S
							-peira	S
							-pere	S
							-pe	S
							-pie	S
							-piro	S
							-pi	S
							-raga	S
							-ra	S
							-rei	S
							-re	S
							-rirei	S
							-ri	S
							-ro	S
							-sia	S
							-si	S
							-ta	S
							-toarei	S
							-toa	S
							-to	S
							-u	S
							-vai	S
							-va	S
							-veaira	S
							-vearea	S
							-veare	S
							-veira	S
							-verea	S
							-vere	S
							-ve	S
							-vio	S
							-vira	S
							-viro	S
							-visivi	S
							-vi	S
							-voiva	S
							-voi	S
							-vorao	S
							-vora	S
							-vo	S
							-vu	S
Sheko	Dizoid	she	Hellenthal (2010: 11-13)	V, N (78) -- cf. p. 73 for a list of suffixes w/ syllabic Ns	none shown (56), none mentioned	ch, sh, ts, xh, xs, zh, ii, ee, aa, oo, uu = monosegmental
							-a, -əra	S	1.5	2
							-a (2)	S	1	1
							-a, -ya (3)	S	1	1.5
							-àb, -əb	S	1	2
							-àbe, -əbe	S	2	3
							-ara, -ra, -r	S	1	2
							-(ə̀)b	S	0.5	1.5
							-bà(à)b	S	1	3
							-bà(à)stà	S	2	5
							-be(y)	S	1	2.5
							-ee, -ə	S	1	1.5
							-èʃǹtà, -ìʃǹtà (1)	S	3	5
							ha-	P	1	2
							há-	P	1	2
							(h)à(à)-	P	1	2
							-ì, <ì>	S/O	1	1
							-ìn, <ì>-ǹ	S/O	1	2
							íʃ(ì)-	P	1.5	2.5
							ítí-	P	2	3
							-(í)t	S	0.5	1.5
							-k	S	0	1
							-ka (1)	S	1	2
							-ka (2)	S	1	2
							-kn	S	1	2
							-kǹ, -ŋ̀	S	1	1.5
							-k'à	S	1	2
							-m	S	0	1
							-ǹ, -m̀ (1)	S	1	1
							-ǹ, -m̀ (2)	S	1	1
							-n, -m (1)	S	1	1
							-n, -m (2)	S	1	1
							-n, -m (3)	S	1	1
							n̩-, m̩-	P	1	1
							-ná, -má	S	1	2
							-on(ka), -onko	S	1.67	3.3
							-o	S	1	1
							-s, -z (1)	S	0	1
							-s (2)	S	0	1
							-s (3)	S	0	1
							-s (4)	S	0	1
							-s, -ʃ (5)	S	0	1
							-t, -tə	S	0.5	1.5
							-t, -t'	S	0.5	1
							-tà	S	1	2
							-tana	S	2	4
							-ù	S	1	1
							yí-	P	1	2
